# Supplementary material for: Megakaryocytes in Bone Metastasis: Protection or Progression?
Source: PubMed Central journal article supplement (PMC6406759; doi:10.3390/cells8020134), 2019-02-08
Supplement: cells-08-00134-s001.pdf [file cells-08-00134-s001.pdf]

**A**

|           | CTR (n=3) | ME (n=3)    |
|-----------|-----------|-------------|
| MKs/field | 5 ± 0.90  | 13 ± 0.70** |

**B**

| Antibody | CTR (n=3)   | ME (n=3)       |
|----------|-------------|----------------|
| ET-1     | 2.56 ± 0.18 | 2.00 ± 0.17    |
| SPARC    | 1.10 ± 0.11 | 3.56 ± 0.18*** |
| HGF      | 1.00 ± 0.17 | 3.56 ± 0.24*** |

**A)** Count of the of MKs in femur sections of control mice (CTR) and bone metastasis bearing mice (ME) after Haematoxylin & Eosin (H&E) staining of bone specimens. **B)** Semi-quantitative analysis of MKs in bone specimens of CTR and ME mice after immunostaining with the indicated antibodies. Both in A and in B, the statistical analysis (*t* test) was performed on three serial section (five fields for each section were randomly selected and counted under 200x magnification) for three mice for each treatment. The tables report the means ± S.E.; \*\*  $p < 0.05$ ; \*\*\*  $p \leq 0.001$  vs respective CTR mice. Representative H&E staining and immunoistochemical images are shown in Figure 2 and 3.
